# Supplementary material for: Cryptotanshinone has curative dual anti-proliferative and immunotherapeutic effects on mouse Lewis lung carcinoma
Source: Springer Nature journal article supplement (doi:10.1007/s00262-019-02326-8), 2019-04-10
Supplement: MOESM1 [file 16646960]

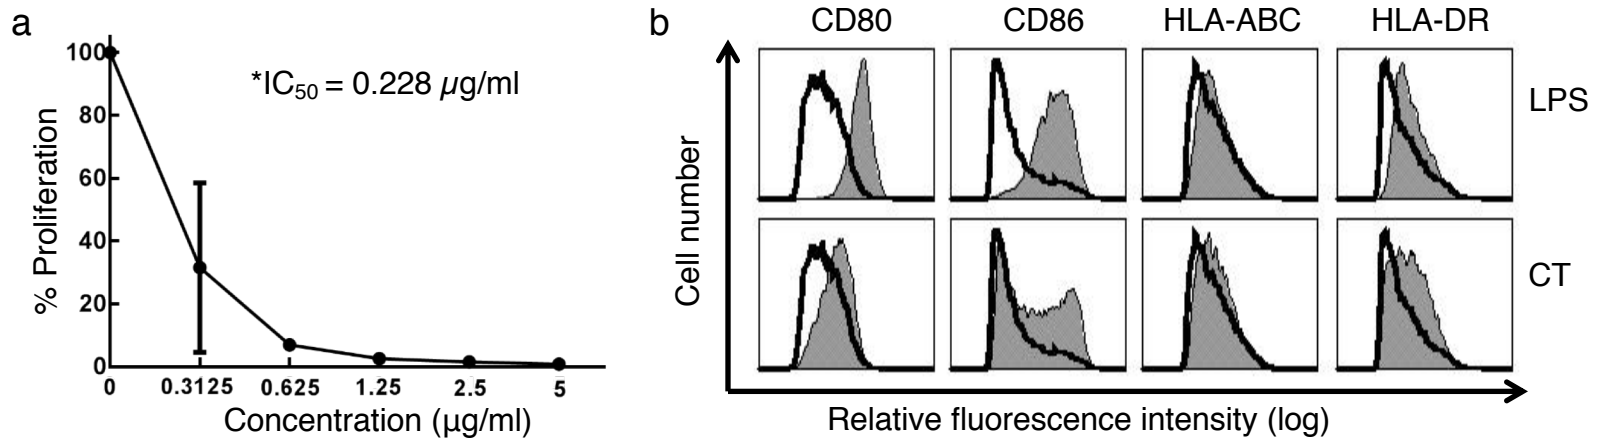

**Fig. 1. CT exhibited the dual capacities of inhibiting the proliferation of human lung cancer cells and inducing the maturation of human DCs.** **a**, A549 human lung cancer cells seeded in a 96-well plate at  $4 \times 10^3$ /well were treated in triplicate with indicated concentrations of CT for 48 h in a CO<sub>2</sub> incubator (37°C humidified air containing 5% CO<sub>2</sub>) and pulsed with 0.5 µCi/well of <sup>3</sup>H-TdR for the last 4 h. After cell harvest and β scintillation counting, the % proliferation was calculated as % proliferation = (CPM with compound - CPM blank) ÷ (CPM without compound - CPM blank) × 100. \*IC<sub>50</sub> was the calculated concentration at which 50% of the proliferation was inhibited. **b**, Human DCs were cultured in a CO<sub>2</sub> incubator for 48 h in the absence (open area) or presence (grey area) of LPS at 100 ng/ml or CT at 10 µg/ml before they were immunostained and analyzed by flow cytometry. Shown are the overlay histograms illustrating the expression of surface stimulatory (CD80, and CD86) and MHC (HLA-ABC and HLA-DR) of sham (solid line) and treated (grey area) DCs.

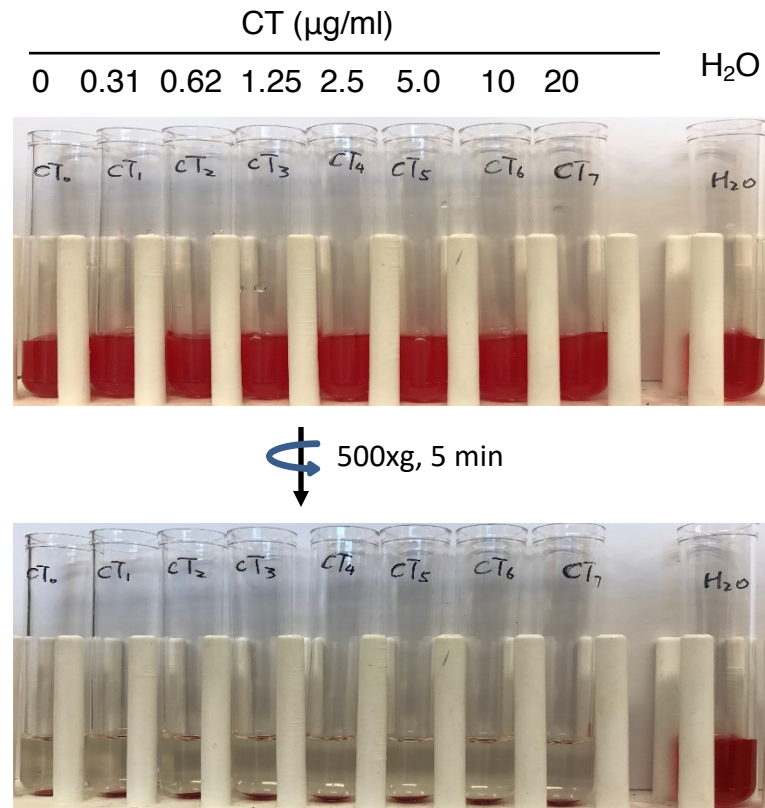

**Fig. 2. CT did not cause hemolysis.** Human erythrocytes were suspended in PBS at 2% (vol./vol.) containing CT at various concentrations or H<sub>2</sub>O (positive hemolysis control). All the tubes were incubated at room temperature for 30 min, and then centrifuged at 500xg for 5 min. The photo images before and after centrifugation were recorded. In the tubes treated without or with CT (0.31-20  $\mu\text{g/ml}$ ), the erythrocytes sedimented to the bottom of the tubes and the supernatant remained clear, demonstrating the lack of hemolysis.

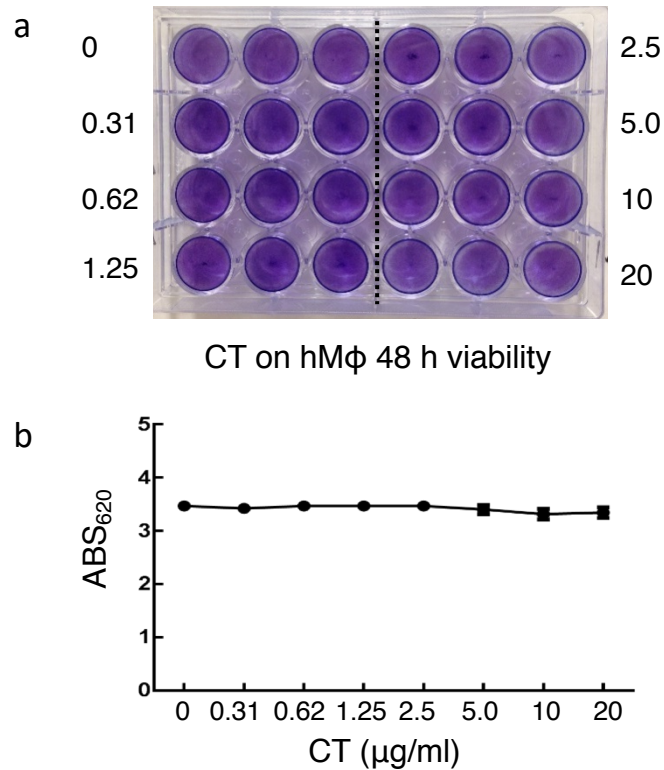

**Fig. 3. CT did not cause lysis of human macrophages (hM $\phi$ ).** Purified monocytes were cultured in a CO<sub>2</sub> incubator in RPMI 1640 supplemented with 10% FBS, 2 mM glutamine, 25 mM HEPES, 100 U/ml penicillin, 100 mg/ml streptomycin, 50 mM 2-mercaptoethanol and 50 ng/ml rhM-CSF (PeproTech) in a 48-well tissue culture plate at  $2 \times 10^5$ /well for 7 days with 50% medium replacement on day 3 and day 5. Subsequently, CT was added into triplicate wells at concentrations as specified and incubated for another 48 h. The plate was stained with 1% Toluidine blue (Sigma, St. Louis, MO) dissolved in 1% sodium tetraborate (Sigma) for 45 min at room temperature, followed by washing with distilled water. After air-drying, the plate was photo-imaged (a). The dye in the plate was solubilized by adding 0.5 ml of 1% SDS and the absorbance at 620 nm of each well was measured using a spectrometer. The results are shown as the average of ABS<sub>620</sub> of triplicate wells (b). Almost identical ABS<sub>620</sub> readings for all groups indicated that CT was not toxic for hM $\phi$ .
